# Supplementary material for: BALOs Improved Gut Microbiota Health in Postlarval Shrimp (Litopenaeus vannamei) After Being Subjected to Salinity Reduction Treatment
Source: Front Microbiol. 2020 Jun 30;11:1296. doi: 10.3389/fmicb.2020.01296 (PMC7344170; doi:10.3389/fmicb.2020.01296)
Supplement: Supplementary file 1 [file Data_Sheet_1.zip › Supplementary Tables.pdf]

TABLE S1 Pearson Correlation analysis on bacterial and PL growth parameters

|                             | In water                  |                         |                                                  | In PL             |                         |                                                  |
|-----------------------------|---------------------------|-------------------------|--------------------------------------------------|-------------------|-------------------------|--------------------------------------------------|
|                             | BALOs<br>vs.<br>TCBC      | BALOs vs.<br>bodyweight | TCBC (7 <sup>th</sup> d)<br>vs. survival<br>rate | BALOs vs.<br>TCBC | BALOs vs.<br>bodyweight | TCBC (7 <sup>th</sup> d)<br>vs. survival<br>rate |
| Correlation<br>coefficients | r =<br>0.892 <sup>1</sup> | NC <sup>2</sup>         | NC                                               | NC                | NC                      | NC                                               |

<sup>1</sup> means significant correlation ( $p < 0.05$ ).

<sup>2</sup> NC: No significant correlation ( $p > 0.05$ ).

TABLE S2 Positive or negative correlations between two orders with statistical significance ( $p < 0.05$ )<sup>1</sup>

| Order                                      | vs. Orders                                                                                                                                                                                             |                                                                                                                                                                                                                                                                                                                                                                                                            |
|--------------------------------------------|--------------------------------------------------------------------------------------------------------------------------------------------------------------------------------------------------------|------------------------------------------------------------------------------------------------------------------------------------------------------------------------------------------------------------------------------------------------------------------------------------------------------------------------------------------------------------------------------------------------------------|
|                                            | Positive (coefficient $\geq 0.6$ )                                                                                                                                                                     | Negative (coefficient $\leq -0.6$ )                                                                                                                                                                                                                                                                                                                                                                        |
| <i>Aeromonadales</i>                       | <i>Gammaproteobacteria_incertain_sedis</i> , <i>Halobacteriales</i> ,<br><i>Methanomicrobiales</i> , <i>Nitrososphaerales</i> ,<br><i>Pseudomonadales</i> , <i>Rhodobacterales</i> ,                   | <i>Acidimicrobiales</i> , <i>Actinomycetales</i> ,<br><i>Alphaproteobacteria_incertain_sedis</i> , <i>Bacteroidales</i> ,<br><i>Bacillales</i> , <i>Bdellovibrionales</i> , <i>Enterobacteriales</i> ,<br><i>Lactobacillales</i> , <i>Methanobacteriales</i> , <i>Myxococcales</i> ,<br><i>Rhizobiales</i> , <i>Rhodospirillales</i> , <i>Sphingomonadales</i> ,<br>Unclassified, <i>Xanthomonadales</i> , |
| <i>Actinomycetales</i>                     | <i>Bacillales</i> , <i>Bacteroidales</i> , <i>Bdellovibrionales</i> ,<br><i>Xanthomonadales</i>                                                                                                        |                                                                                                                                                                                                                                                                                                                                                                                                            |
| <i>Bacteroidales</i>                       | <i>Alphaproteobacteria_incertain_sedis</i> , <i>Bacillales</i> ,<br><i>Bdellovibrionales</i> , <i>Burkholderiales</i> ,<br><i>Desulfuromonadales</i> , <i>Nitrospirales</i> , <i>Xanthomonadales</i> , |                                                                                                                                                                                                                                                                                                                                                                                                            |
| <i>Bdellovibrionales</i>                   | <i>Alphaproteobacteria_incertain_sedis</i> , <i>Bacillales</i> ,<br><i>Burkholderiales</i> , <i>Desulfuromonadales</i> , <i>Nitrospirales</i> ,<br><i>Xanthomonadales</i> ,                            |                                                                                                                                                                                                                                                                                                                                                                                                            |
| <i>Gammaproteobacteria_incertain_sedis</i> | <i>Desulfarculales</i> , <i>Rhodobacterales</i> , <i>Rickettsiales</i> ,<br><i>Thiotrichales</i> , <i>Vibrionales</i> ,                                                                                | <i>Actinomycetales</i> , <i>Alphaproteobacteria_incertain_sedis</i> ,<br><i>Bacteroidales</i> , <i>Bdellovibrionales</i> , <i>Lactobacillales</i> ,<br><i>Methanosarcinales</i> , <i>Myxococcales</i> , <i>Nitrospirales</i> ,<br><i>Rhizobiales</i> , <i>Rhodospirillales</i> , Unclassified,<br><i>Xanthomonadales</i>                                                                                   |
| <i>Halobacteriales</i>                     | <i>Nitrosopumilales</i> , <i>Rhodobacterales</i> , <i>Thiotrichales</i> ,<br><i>Vibrionales</i>                                                                                                        | <i>Actinomycetales</i> , <i>Bacteroidales</i> , <i>Bacillales</i> ,<br><i>Bdellovibrionales</i> , <i>Desulfuromonadales</i> ,<br><i>Enterobacteriales</i> , <i>Myxococcales</i> , <i>Nitrospirales</i> ,<br><i>Rhizobiales</i> , <i>Rhodospirillales</i> , <i>Sphingomonadales</i> ,                                                                                                                       |

|                           |                                                                                                                                                                                                                                                                                                                                   |                                                                                                                                                                                                                                                                                                                                                                                                                                                                                                                                                                                                                                                                                                                                                                                                                                                                                                                                            |
|---------------------------|-----------------------------------------------------------------------------------------------------------------------------------------------------------------------------------------------------------------------------------------------------------------------------------------------------------------------------------|--------------------------------------------------------------------------------------------------------------------------------------------------------------------------------------------------------------------------------------------------------------------------------------------------------------------------------------------------------------------------------------------------------------------------------------------------------------------------------------------------------------------------------------------------------------------------------------------------------------------------------------------------------------------------------------------------------------------------------------------------------------------------------------------------------------------------------------------------------------------------------------------------------------------------------------------|
|                           |                                                                                                                                                                                                                                                                                                                                   | unclassified, <i>Xanthomonadales</i> ,                                                                                                                                                                                                                                                                                                                                                                                                                                                                                                                                                                                                                                                                                                                                                                                                                                                                                                     |
| <i>Lactobacillales</i>    | <i>Actinomycetales</i> , <i>Alteromonadales</i> , <i>Bacteroidales</i> ,<br><i>Enterobacteriales</i> , <i>Gemmatimonadales</i> , <i>Rhizobiales</i> ,<br><i>Rhodospirillales</i>                                                                                                                                                  |                                                                                                                                                                                                                                                                                                                                                                                                                                                                                                                                                                                                                                                                                                                                                                                                                                                                                                                                            |
| <i>Methanomicrobiales</i> | <i>Pasteurellales</i> , <i>Rhodobacterales</i> , <i>Rickettsiales</i> ,<br><i>Vibrionales</i>                                                                                                                                                                                                                                     | <i>Actinomycetales</i> , <i>Alphaproteobacteria_incertae_sedis</i> ,<br><i>Bacillales</i> , <i>Bacteroidales</i> , <i>Desulfuromonadales</i> ,<br><i>Methanosarcinales</i> , <i>Myxococcales</i> , <i>Nitrospirales</i> ,<br><i>Rhodospirillales</i> , <i>Rhizobiales</i> , <i>Sphingobacteriales</i> ,<br><i>Sphingomonadales</i> , unclassified, <i>Xanthomonadales</i> ,<br><i>Actinomycetales</i> , <i>Bacillales</i> , <i>Bacteroidales</i> ,<br><i>Bdellovibrionales</i> , <i>Gemmatimonadales</i> , <i>Nitrospirales</i> ,<br><i>Rhizobiales</i> , <i>Rhodospirillales</i> , <i>Sphingobacteriales</i> ,<br><i>Sphingomonadales</i> , unclassified, <i>Xanthomonadales</i><br><i>Actinomycetales</i> , <i>Bacillales</i> , <i>Bacteroidales</i> ,<br><i>Bdellovibrionales</i> , <i>Methanosarcinales</i> , <i>Myxococcales</i> ,<br><i>Nitrospirales</i> , <i>Rhizobiales</i> , <i>Sphingomonadales</i> ,<br><i>Xanthomonadales</i> |
| <i>Pseudomonadales</i>    | <i>Rickettsiales</i> , <i>Nitrosopumilales</i> , <i>Vibrionales</i>                                                                                                                                                                                                                                                               |                                                                                                                                                                                                                                                                                                                                                                                                                                                                                                                                                                                                                                                                                                                                                                                                                                                                                                                                            |
| <i>Rhodobacterales</i>    | <i>Pseudomonadales</i> , <i>Rickettsiales</i> , <i>Vibrionales</i>                                                                                                                                                                                                                                                                |                                                                                                                                                                                                                                                                                                                                                                                                                                                                                                                                                                                                                                                                                                                                                                                                                                                                                                                                            |
| <i>Rhodospirillales</i>   | <i>Actinomycetales</i> , <i>Alphaproteobacteria_incertae_sedis</i> ,<br><i>Bacteroidales</i> , <i>Bdellovibrionales</i> , <i>Enterobacteriales</i> ,<br><i>Methanobacteriales</i> , <i>Myxococcales</i> , <i>Nitrospirales</i> ,<br><i>Rhizobiales</i> , <i>Sphingomonadales</i> , <i>Vibrionales</i> ,<br><i>Xanthomonadales</i> |                                                                                                                                                                                                                                                                                                                                                                                                                                                                                                                                                                                                                                                                                                                                                                                                                                                                                                                                            |
| <i>Rickettsiales</i>      |                                                                                                                                                                                                                                                                                                                                   | <i>Actinomycetales</i> , <i>Bacillales</i> , <i>Bacteroidales</i> ,<br><i>Gemmatimonadales</i> , <i>Nitrospirales</i> , <i>Rhizobiales</i> ,<br><i>Sphingomonadales</i> , <i>Xanthomonadales</i>                                                                                                                                                                                                                                                                                                                                                                                                                                                                                                                                                                                                                                                                                                                                           |
| <i>Sphingomonadales</i>   | <i>Acidimicrobiales</i> , <i>Actinomycetales</i> ,<br><i>Alphaproteobacteria_incertae_sedis</i> , <i>Bacteroidales</i> ,<br><i>Bdellovibrionales</i> , <i>Gemmatimonadales</i> , <i>Myxococcales</i> ,                                                                                                                            |                                                                                                                                                                                                                                                                                                                                                                                                                                                                                                                                                                                                                                                                                                                                                                                                                                                                                                                                            |

---

|                    |                                                                                                                                                                                                                                                                                                                                  |
|--------------------|----------------------------------------------------------------------------------------------------------------------------------------------------------------------------------------------------------------------------------------------------------------------------------------------------------------------------------|
| <i>Vibrionales</i> | <i>Rhizobiales, Sphingobacteriales, Xanthomonadales,</i><br><i>Acidimicrobiales, Actinomycetales,</i><br><i>Alphaproteobacteria_incertae_sedis, Bacillales,</i><br><i>Bacteroidales, Bdellovibrionales, Desulfuromonadales,</i><br><i>Myxococcales, Nitrospirales, Rhizobiales,</i><br><i>Sphingomonadales, Xanthomonadales,</i> |
|--------------------|----------------------------------------------------------------------------------------------------------------------------------------------------------------------------------------------------------------------------------------------------------------------------------------------------------------------------------|

---

<sup>1</sup> Within PL microbiota, potentially positive or negative interactions were performed using SparCC approach (Friedman and Alm, 2012). Only those interactions with statistical significance ( $p < 0.05$ ) and coefficients of 0.6 or higher (absolute values) were given out.

Table S3 Positive or negative correlations between two genera with statistically significance ( $p < 0.05$ )<sup>1</sup>

| Genus                       | vs. Genera                                                                                                                                       |                                                                                                                                                                                                                                                                                           |
|-----------------------------|--------------------------------------------------------------------------------------------------------------------------------------------------|-------------------------------------------------------------------------------------------------------------------------------------------------------------------------------------------------------------------------------------------------------------------------------------------|
|                             | Positive (coefficient $\geq 0.6$ )                                                                                                               | Negative (coefficient $\leq -0.6$ )                                                                                                                                                                                                                                                       |
| <i>Aciditerrimonas</i>      | <i>Aridibacter, Gaiella, Gemmatimonas, Gp4, Gp6, Gp16, Kofleria, Rothia, Saccharibacteria_genera_incertae_sedis, Sphingomonas, unclassified,</i> | <i>Granulicatella</i>                                                                                                                                                                                                                                                                     |
| <i>Acinetobacter</i>        | <i>Devosia, Pseudolabrys,</i>                                                                                                                    | <i>Aciditerrimonas, Gaiella, Gemmata, Gemmatimonas, Gp4, Gp6, Gp7, Gp10, Gp16, Hydrogenophaga, Klebsiella, Lacibacterium, Nitrospira, Pirellula, Rothia, Saccharibacteria_genera_incertae_sedis, Sphingobium, Sphingomonas, Streptococcus, unclassified, WPS-1_genera_incertae_sedis,</i> |
| <i>Actinomyces</i>          | <i>Aciditerrimonas, Gemmata, Gp6, unclassified</i>                                                                                               | <i>Gimesia, Gp10, Ilumatobacter, Nitrospira, Nocardioide</i>                                                                                                                                                                                                                              |
| <i>Arthrobacter</i>         | <i>Povalibacter,</i>                                                                                                                             | <i>Gp4, Gp10, Kofleria,</i>                                                                                                                                                                                                                                                               |
| <i>Bacillus</i>             | <i>Acinetobacter, Armatimonadetes_gp5, Gp10, Lactobacillus, Methanomassiliicoccus, Methanosarcina, Pseudomonas,</i>                              | <i>Aciditerrimonas, Actinomyces, Arthrobacter, Chryseolinea, Flavitalea, Hydrogenophaga, Hyphomicrobium, Nitrospira, Pirellula, Saccharibacteria_genera_incertae_sedis, Shewanella, Sphingobium</i>                                                                                       |
| <i>Escherichia/Shigella</i> | <i>Acinetobacter, Delftia, Gp10, Gp25, Massilia, Nocardioide, Thermogutta</i>                                                                    | <i>Aciditerrimonas, Arthrobacter, Gemmata, Gemmatimonas, Gp3, Gp4, Gp5, Gp6, Hydrogenophaga, Klebsiella, Lacibacterium, Nitrospira, Pirellula, Povalibacter, Sphingobium, Streptococcus, WPS-1_genera_incertae_sedis</i>                                                                  |
| <i>Eubacterium</i>          | <i>Blastocatella, Romboutsia, Saccharibacteria_genera_incertae_sedis, WPS-1_genera_incertae_sedis,</i>                                           | <i>Gemmatimonas, Gp4, Gp10, Gp16, Hydrogenophaga, Klebsiella, Microvirga, Mycobacterium, Saccharibacteria_genera_incertae_sedis, Shewanella,</i>                                                                                                                                          |

|                        |                                                                                                                                |                                                                                                                                                                                                            |
|------------------------|--------------------------------------------------------------------------------------------------------------------------------|------------------------------------------------------------------------------------------------------------------------------------------------------------------------------------------------------------|
| <i>Flavisolibacter</i> | <i>Actinomyces, Hydrogenophaga, Phycisphaera, Pseudomonas, Shewanella</i>                                                      | <i>Sphingomonas, Gp4, Gp10, Saccharibacteria_genera_incertae_sedis, Skermanella, unclassified</i>                                                                                                          |
| <i>Gemmatimonas</i>    | <i>Aquicella, Aridibacter, Gp4, Gp6 Gp10, Kofleria, Ohtaekwangia, Serratia, Sphingomonas</i>                                   |                                                                                                                                                                                                            |
| <i>Hydrogenophaga</i>  | <i>Aciditerrimonas, Azospira, Gaiella, Gemmatimonas, Gp6, Gp7, Gp10, Ohtaekwangia, Sphingobium, Streptococcus</i>              |                                                                                                                                                                                                            |
| <i>Klebsiella</i>      | <i>Gp3, Gp4, Kofleria, Ohtaekwangia, Streptococcus, unclassified</i>                                                           | <i>Methanomassiliicoccus, Petrimonas</i>                                                                                                                                                                   |
| <i>Lactobacillus</i>   | <i>Acinetobacter, Escherichia/Shigella, Gp10, Massilia, Pseudomonas</i>                                                        | <i>Actinomyces, Arthrobacter, Gemmata, Gemmatimonas Gp3, Gp5, Gp6, Hydrogenophaga, Klebsiella, Nitrospira, Pirellula, Sphingobium, Streptococcus, Arthrobacter, Gemmata, Gp3, Pirellula, Streptococcus</i> |
| <i>Lysobacter</i>      | <i>Aciditerrimonas, Actinomyces, Chryseolinea, Gemmatimonas, Gp6, Gp10, Massilia, Methanomassiliicoccus</i>                    |                                                                                                                                                                                                            |
| <i>Methanosarcina</i>  | <i>Acinetobacter, Escherichia/Shigella, Lactobacillus, Massilia, Methanomassiliicoccus, Pseudomonas, Psychrobacter</i>         | <i>Aciditerrimonas, Actinomyces, Arthrobacter, Gemmata, Gemmatimonas, Gp3, Gp6, Hydrogenophaga, Klebsiella, Nitrospira, Pirellula, Saccharibacteria_genera_incertae_sedis, Sphingobium, Streptococcus</i>  |
| <i>Nitrospira</i>      | <i>Aciditerrimonas, Gemmata, Gp3, Gp5, Hydrogenophaga, Klebsiella, Povalibacter, Sphingobium, WPS-1_genera_incertae_sedis,</i> | <i>Gp10, Kofleria, Methanomassiliicoccus</i>                                                                                                                                                               |
| <i>Pirellula</i>       | <i>Aciditerrimonas, Gp3, Gp6, Hydrogenophaga, Klebsiella, Lacibacterium, Methanotherix, Mycobacterium, Sphingobium</i>         | <i>Granulicatella, Methanomassiliicoccus</i>                                                                                                                                                               |
| <i>Pseudomonas</i>     | <i>Acinetobacter, Aquisphaera, Escherichia/Shigella,</i>                                                                       | <i>Aciditerrimonas, Gemmata, Gemmatimonas, Gp3, Gp4,</i>                                                                                                                                                   |

|                                               |                                                                                                                                                                                                                 |                                                                   |
|-----------------------------------------------|-----------------------------------------------------------------------------------------------------------------------------------------------------------------------------------------------------------------|-------------------------------------------------------------------|
|                                               | <i>Massilia, Mesorhizobium, Gp25</i>                                                                                                                                                                            | <i>Gp5, Gp6, Gp17, Hydrogenophaga, Shewanella, Streptococcus,</i> |
| <i>Saccharibacteria_genera_incertae_sedis</i> | <i>Gp4, Gp6, Gp10, Gp25, Kofleria</i>                                                                                                                                                                           |                                                                   |
| <i>Shewanella</i>                             | <i>Gemmatimonas, Gp5, Kofleria, Ohtaekwangia</i>                                                                                                                                                                | <i>Aridibacter, Gp25, Methanomassiliicoccus, Methanotherix,</i>   |
| <i>Sphingobium</i>                            | <i>Gaiella, Gemmatimonas, Gp6, Gp7, Gp10, Gp16, Klebsiella, Kofleria, Ohtaekwangia, Rothia, Saccharibacteria_genera_incertae_sedis, Sphingomonas, Streptococcus, unclassified, WPS-1_genera_incertae_sedis,</i> |                                                                   |
| <i>Sphingomonas</i>                           | <i>Gp4, Gp25, Methanomassiliicoccus, Serratia</i>                                                                                                                                                               |                                                                   |
| <i>Streptococcus</i>                          | <i>Aciditerrimonas, Gaiella, Gemmatimonas, Gp6, Kofleria, Ohtaekwangia, Rothia, Saccharibacteria_genera_incertae_sedis, unclassified,</i>                                                                       |                                                                   |

<sup>1</sup> Within PL microbiota, potentially positive or negative interactions were performed using SparCC approach (Friedman and Alm, 2012). Only those interactions with statistical significance ( $p < 0.05$ ) and coefficients of 0.6 or higher (absolute values) were given out.

TABLE S4 Relative abundance of some functional genera/probiotics and their potential functions

| Genus                   | Relative abundance (%) |      |      |      |     |     | Potential functions              | Reference                               |
|-------------------------|------------------------|------|------|------|-----|-----|----------------------------------|-----------------------------------------|
|                         | BD1                    | SD1  | CD1  | BD7  | SD7 | CD7 |                                  |                                         |
| <i>Actinomyces</i>      | 0                      | 0    | 0    | 0.38 | 0   | 0   | Antibacterials producer          | Duan et al., 2020                       |
| <i>Akkermansia</i>      | 0                      | 0    | 0    | 0.09 | 0   | 0   | Probiotics                       | Fujio-Vejar et al., 2017                |
| <i>Arthrobacter</i>     | 0                      | 0    | 0.2  | 0.28 | 0   | 0   | Bioactives producer              | Xue et al., 2016                        |
| <i>Bacillus</i>         | 0                      | 0.01 | 0.01 | 0.4  | 0   | 0   | Probiotics                       | Zeng et al., 2017                       |
| <i>Bacteroides</i>      | 0                      | 0    | 0.01 | 0.11 | 0   | 0   | Vitamin B <sub>12</sub> producer | Zeng et al., 2017                       |
| <i>Bifidobacterium</i>  | 0                      | 0    | 0    | 0.01 | 0   | 0   | Probiotics                       | Ray et al., 2014                        |
| <i>Cetobacterium</i>    | 0                      | 0    | 0    | 0.03 | 0   | 0   | Vitamin B <sub>12</sub> producer | Zeng et al., 2017                       |
| <i>Chryseomicrobium</i> | 0.12                   | 2.34 | 0    | 0.04 | 0   | 0   | Protease producer                | Farha et al., 2018                      |
| <i>Clostridium</i>      | 0                      | 0    | 0    | 0.08 | 0   | 0   | Commensal-pathogen               | Anand et al., 2016                      |
| <i>Corynebacterium</i>  | 0                      | 0.01 | 0.06 | 0.05 | 0   | 0   | Probiotic candidate              | Nayak and Mukherjee, 2011               |
| <i>Enterococcus</i>     | 0                      | 0    | 0.01 | 0.1  | 0   | 0   | Probiotics                       | Chang and Liu, 2002                     |
| <i>Erythrobacter</i>    | 0                      | 0.04 | 0.03 | 0.19 | 0   | 0   | Shrimp shell degradation         | Ruengjitchatchawalya and Wantawin, 2011 |
| <i>Exiguobacterium</i>  | 0                      | 5.99 | 0    | 0.05 | 0   | 0   | Metabolism of nutrients          | Cong et al., 2017                       |
| <i>Faecalibacterium</i> | 0                      | 0    | 0.01 | 0.01 | 0   | 0   | Shrimp probiotic                 | Cornejo-Granados et al., 2017           |

|                            |      |      |       |      |      |      |                                              |                                |
|----------------------------|------|------|-------|------|------|------|----------------------------------------------|--------------------------------|
| <i>Gemmatimonas</i>        | 0    | 0.01 | 0.02  | 3.9  | 0    | 0    | NO <sub>2</sub> metabolism                   | Cheesanford et al., 2019       |
| <i>Halolactibacillus</i>   | 0    | 0    | 0     | 0.01 | 0    | 0    | Antibacterials producer                      | Suresh et al., 2015            |
| <i>Halomonas</i>           | 0.01 | 0.07 | 17.89 | 0.01 | 0    | 0    | Vibrio growth inhibition                     | Alfiansah et al., 2018         |
| <i>Hydrogenophaga</i>      | 0    | 0.07 | 0.26  | 0.96 | 0    | 0    | Organic pollutants degradation               | Chung et al., 2007             |
| <i>Lactobacillus</i>       | 0    | 0.01 | 0.03  | 0.17 | 0.01 | 0    | Probiotics                                   | Zeng et al., 2017              |
| <i>Lactococcus</i>         | 0    | 0    | 0     | 0.04 | 0    | 0    | Probiotics                                   | Dawood et al., 2016            |
| <i>Leuconostoc</i>         | 0    | 0    | 0     | 0.02 | 0    | 0    | Probiotics                                   | Martinez and De Martinis, 2006 |
| <i>Massilia</i>            | 0    | 0    | 0     | 0.13 | 0    | 0    | Nitrate reduction                            | Hou et al., 2017               |
| <i>Meridianimaribacter</i> | 0    | 0.01 | 0.06  | 0    | 0    | 0    | Probiotic candidate                          | Zheng et al., 2017             |
| <i>Micrococcus</i>         | 0    | 0    | 0     | 0.03 | 0    | 0    | Anti- <i>Aeromonas salmonicida</i> infection | Irianto and Austin, 2002       |
| <i>Paenibacillus</i>       | 0    | 0    | 0     | 0.01 | 0    | 0    | Antimicrobial peptides                       | Abaidullah et al., 2019        |
| <i>Pantoea</i>             | 0    | 0    | 0     | 0    | 0.03 | 0    | Disease resistance promotion                 | Takahashi et al.; 2000         |
| <i>Paracoccus</i>          | 0    | 0.09 | 9.53  | 0.12 | 0    | 0    | Dentrification and sulphur oxidation         | Jaffer et al., 2019            |
| <i>Propionibacterium</i>   | 0    | 0    | 0     | 0.02 | 0    | 0    | Probiotics                                   | Cornejo-Granados et al., 2017  |
| <i>Pseudomonas</i>         | 2.8  | 2.75 | 46.16 | 1.11 | 0.01 | 0.01 | Some probiotic, some opportunistic pathogen  | Rungrassamee et al., 2013      |
| <i>Pseudorhodobacter</i>   | 0    | 0    | 0     | 0.02 | 0    | 0    | Denitrification                              | Zhou et al., 2019              |
| <i>Psychrobacter</i>       | 0    | 0    | 0.01  | 0.04 | 1.31 | 1.15 | Ammonia oxidation                            | Sangnoi et al., 2016           |

|                         |      |       |       |       |      |      |                                             |                                |
|-------------------------|------|-------|-------|-------|------|------|---------------------------------------------|--------------------------------|
| <i>Rhodobacter</i>      | 0    | 0     | 0.01  | 0     | 0    | 0    | Antioxidant activities                      | An et al., 2019                |
| <i>Ruegeria</i>         | 0    | 0.06  | 0.05  | 0     | 0    | 0    | Probiotics                                  | Sonnenschein et al., 2017      |
| <i>Saccharibacteria</i> | 0    | 0     | 0     | 0.44  | 0    | 0    | Shrimp growth enhancer                      | Fan and Li, 2019               |
| <i>Sphingomonas</i>     | 0    | 0.02  | 0.04  | 4.83  | 0.01 | 0    | Vibrio growth inhibition                    | Yun et al., 2019               |
| <i>Streptococcus</i>    | 0    | 0.03  | 0.01  | 1.13  | 0    | 0    | Some probiotic, some opportunistic pathogen | Fan et al., 2019               |
| <i>Streptomyces</i>     | 0    | 0     | 0     | 0.05  | 0    | 0    | Antibacterials producer                     | Mahajan and Balachandran, 2012 |
| <i>Sulfitobacter</i>    | 0    | 0.01  | 0.02  | 0     | 0    | 0    | Sulfite-oxidizing ability                   | Pukall et al., 1999            |
| <i>Tropicibacter</i>    | 0.03 | 3.48  | 1.04  | 0.03  | 0.05 | 0.01 | Dentrification and sulphur oxidation        | Harwati et al., 2009           |
| <i>Weissella</i>        | 0    | 0     | 0     | 0     | 0.01 | 0    | Probiotics                                  | Chen et al., 2017a             |
| SUM                     | 2.97 | 15.04 | 75.46 | 15.11 | 1.43 | 1.17 |                                             |                                |

The relative abundance of potential probiotics in BD group was increased over the 7-day test period, while they were decreased in SD and control (CD) groups.

Table S5 Relative abundance of potential pathogens during testing period and their potential roles

| Genus                 | Relative abundance (%) |       |       |      |       |       | Potential roles                       | Reference                      |
|-----------------------|------------------------|-------|-------|------|-------|-------|---------------------------------------|--------------------------------|
|                       | BD1                    | SD1   | CD1   | BD7  | SD7   | CD7   |                                       |                                |
| <i>Acinetobacter</i>  | 84.81                  | 82.19 | 13.12 | 0.68 | 98.41 | 98.72 | Opportunistic pathogen                | Saejung et al., 2014           |
| <i>Aeromonas</i>      | 0                      | 0     | 0.01  | 0.05 | 0     | 0.01  | Opportunistic pathogen                | Cornejo-Granados et al., 2017  |
| <i>Brucella</i>       | 0                      | 0     | 0.01  | 0.04 | 0     | 0     | Brucellosis                           | Mahajan and Balachandran, 2012 |
| <i>Flavobacterium</i> | 0.01                   | 0.04  | 0.13  | 0.09 | 0     | 0     | Opportunistic pathogen                | Nematollahi et al., 2003       |
| <i>Fusobacterium</i>  | 0                      | 0     | 0     | 0.03 | 0     | 0     | Commensal-pathogen                    | Anand et al., 2016             |
| <i>Klebsiella</i>     | 0.02                   | 0.29  | 0.54  | 2.28 | 0.01  | 0.01  | Pathogen to carp                      | Das et al., 2018)              |
| <i>Legionella</i>     | 0                      | 0     | 0     | 0.01 | 0     | 0     | Legionnaires' disease                 | Hoge and Breiman, 1991         |
| <i>Nautella</i>       | 0.1                    | 0.12  | 1.77  | 0    | 0     | 0.01  | Pathogen to red alga and brine shrimp | Zheng et al., 2017             |
| <i>Nocardioides</i>   | 0                      | 0     | 0     | 0.13 | 0     | 0     | Opportunistic pathogen                | Lightner and Redman, 1998      |
| <i>Photobacterium</i> | 0                      | 0.03  | 0.01  | 0    | 0     | 0     | Opportunistic pathogen/symbiotic      | Rungrassamee et al., 2014      |
| <i>Ralstonia</i>      | 0                      | 0     | 0     | 0.04 | 0     | 0     | Opportunistic human pathogens         | Fera et al., 2007              |
| <i>Rickettsia</i>     | 0                      | 0     | 0     | 0.02 | 0     | 0     | Opportunistic pathogen                | Lightner and Redman, 1998      |

|                       |       |       |       |      |       |       |                                                                |                     |
|-----------------------|-------|-------|-------|------|-------|-------|----------------------------------------------------------------|---------------------|
| <i>Shewanella</i>     | 0     | 0     | 0.02  | 0.28 | 0     | 0     | Shewanellosis                                                  | Zhang et al., 2016  |
| <i>Staphylococcus</i> | 0     | 0     | 0.02  | 0.08 | 0     | 0     | Hepatopancreas browned disease in<br><i>Eriocheir sinensis</i> | Fu et al., 2019     |
| <i>Tenacibaculum</i>  | 0.01  | 0.03  | 0.04  | 0    | 0     | 0     | “Mouth rot” disease in Atlantic salmon                         | Jia et al., 2020    |
| <i>Vibrio</i>         | 0     | 0     | 0.05  | 0    | 0     | 0     | Vibriosis                                                      | Moreno et al., 2017 |
| SUM                   | 84.94 | 82.66 | 15.59 | 3.64 | 98.42 | 98.75 |                                                                |                     |

---

The relative abundance of potential pathogens in BD group was decreased over the 7-day test period, while they were increased in SD and control (CD) groups.
